# Supplementary material for: Posttraumatic Stress Disorder Among Adults in Communities With Mass Violence Incidents
Source: PubMed Central journal article supplement (PMC11282439; doi:10.1001/jamanetworkopen.2024.23539), 2024-07-26
Supplement: jamanetwopen-e2423539-s002.pdf [file jamanetwopen-e2423539-s002.pdf]

## Data Sharing Statement

Moreland. Posttraumatic Stress Disorder Among Adults in Communities With Mass Violence Incidents. *JAMA Netw Open*. Published July 26, 2024.  
doi:10.1001/jamanetworkopen.2024.23539

### Data

**Data available:** No
